# Supplementary material for: Epigenetics meets proteomics in an epigenome-wide association study with circulating blood plasma protein traits
Source: PubMed Central journal article supplement (PMC6941977; doi:10.1038/s41467-019-13831-w), 2020-01-03
Supplement: 41467_2019_13831_MOESM14_ESM.pdf [file 41467_2019_13831_MOESM14_ESM.pdf]

**Title: Supplementary Data 1:**

**Description:** Annotation of the SOMAmer probes.

**Title: Supplementary Data 2:**

**Description:** Replicated pQTM identified at the different steps of the pEWAS.

**Title: Supplementary Data 3:**

**Description:** pQTM identified and replicated at the different EWAS steps.

**Title: Supplementary Data 4:**

**Description:** pEWAS results – 98 replicated CpG-protein associations (pQTMs) after various regression steps.

**Title: Supplementary Data 5:**

**Description:** Enrichment of pQTM for various CpG site characteristics.

**Title: Supplementary Data 6:**

**Description:** EWAS atlas lookup of the 98 final pQTMs.

**Title: Supplementary Data 7:**

**Description:** Clinical phenotypes associated with pEWAS proteins (KORA data).

**Title: Supplementary Data 8:**

**Description:** Clinical phenotypes associated with pEWAS CpGs (KORA data).

**Title: Supplementary Data 9:**

**Description:** Metabolites associated with pQTM CpG sites (QMDiab data).

**Title: Supplementary Data 10:**

**Description:** Replication of previously reported pQTMs (Ahsan *et al.* [7]).

**Title: Supplementary Data 11:**

**Description:** NLRC5 (cg07839457) to protein associations (KORA) at relaxed significance level ( $p=0.05/1,123$ ).

**Title: Supplementary Data 12:**

**Description:** Comparison of our successive residuals method to a joint one-step regression.
